# Supplementary material for: The relationship between telomere length and mortality risk in non-model vertebrate systems: a meta-analysis
Source: Philos Trans R Soc Lond B Biol Sci. 2018 Jan 15;373(1741):20160447. doi: 10.1098/rstb.2016.0447 (PMC5784067; doi:10.1098/rstb.2016.0447)
Supplement: Supplementary Table 1 [file rstb20160447supp1.xlsx]

## Sheet: All data
First_author	Year	Journal	Volume	Search Engine	Title	Abstract	Full Text	Accepted	Included	Reason for rejection
Angelier	2013			H	x	x		y
Aydinonat	2014			H	x	x	x	y	y	NA
Bauch	2014			H	x	x	x	y	y	NA
Belmaker	2016			H	x	x	x	y
Blevin	2016			H	x	x	x	n	n	no survival data
Brown	2012			H	x	x	x	n	n	some individuals were culled
Caprioli	2013			H	x	x	x	y	y	NA
Dantzer	2015			H	x	x	x	n	n	maximum lifespan data only
Le Vaillant	2015			H	x	x	x	n	n	no survival data
McLennan	2016			H	x	x	x	n	n	does not relate fry survival with emryo telomere length
Noguera	2016			H	x	x	x	n	n	no survival data
Reichert	2014			H	x	x	x	y
Sebastiano	2017			H	x	x	x	y
Ujvari	2016			H	x	x	x	y	y	NA
Ujvari	2009			H	x	x	x	y
Vleck	2011			H	x	x	x	n	n	review
Watson	2015			H	x	x	x	y
Pauliny	2006			I	x	x	x	y
Adriaenssens	2016			S	x	x	x	n	n	no survival data
Asghar	2015			S	x	x	x	y	y	NA
Barrett	2013			S	x	x		y	y	NA
Bauch	2016			S	x	x	x	n	n	no survival data
Beaulieu	2011			S	x	x	x	y	y
Bize	2009			S	x	x		y	y	NA
Boonekamp	2014			S	x	x		y	y	NA
Fairlie	2016			S	x	x		y	y	NA
Foote	2011			S	x	x	x	y
Gao	2015			S	x	x	x	n	n	Telomere length not measured in survival analysis
Geiger	2012			S	x	x	x	y
Gopalakrishnan	2013			S	x	x	x	n	n	Telomere length not related to individual survival (fish killed and pooled)
Hall	2004			S	x	x	x	n	n	no survival data
Hammers	2015			S	x	x	x	n	n	review
Hartmann	2009			S	x	x	x	y	n	Telomere length not related to individual survival (fish killed and pooled)
Haussmann	2005b			S	x	x		y
Haussmann	2003			S	x	x	x	n	n	average lifespan data only
Haussmann	2008			S	x	x	x	n	n	no survival data
Haussmann	2012			S	x	x	x	n	n	no survival data
Heidinger	2012			S	x	x		y	y	NA
Herborn	2014			S	x	x	x	n	n	no survival data
Hoelzl	2016			S	x	x	x	n	n	no survival data
Ilmonen	2008			S	x	x	x	y
Jennngs	1999			S	x	x	x	n	n	TL measured from multiple tissues
Mizutani	2013			S	x	x	x	n	n	no survival data
Mizutani	2016			S	x	x	x	n	n	no survival data
Monaghan	2006			S	x	x	x	n	n	review
Näslund	2015			S	x	x	x	y	n	survival related to growth only
Nettle	2013			S	x	x	x	n	n	no survival data
Olsson	2011			S	x	x		y
Olsson	2011			S	x	x		y	y	NA
Ouyang	2016			S	x	x	x	y
Plot	2012			S	x	x	x	n	n	no survival data
Reichert	2014			S	x	x	x	n	n	no survival data
Reichert	2015a			S	x	x	x	y
Reichert	2015b			S	x	x	x	n	n	no survival data
Ringsby	2015			S	x	x	x	n	n	no survival data
Salmón	2016			S	x	x	x	n	n	no survival data
Salomons	2009			S	x	x		y
Schultner	2014			S	x	x	x	n	n	no survival data
Stier	2014			S	x	x		y	y	NA
Stier	2015			S	x	x	x	n	n	no survival data
Stier	2016			S	x	x	x	n	n	no survival data
Tissier	2014			S	x	x	x	n	n	no survival data
Turbill	2012			S	x	x	x	n	n	no survival data
Turbill	2013			S	x	x	x	n	n	no survival data
Vleck	2003			S	x	x	x	n	n	maximum lifespan data only
Wang	2013			S	x	x	x	n	n	no survival data
Watson	2016			S	x	x	x	n	n	no survival data
Young	2013			S	x	x	x	n	n	no survival data
Young	2015			S	x	x	x	n	n	no survival data
foote
froy
Pauliny
sudyka
sudyka

## Sheet: for meta wo_T_A accepted papers
First_author	Year	Journal	Volume	Accepted	Included	Reason for rejection
Asghar	2015			y	y	NA
Aydinonat	2014			y	y	NA
Bauch	2014			y	y	NA
Beaulieu	2011			y	y
Belmaker	2016			y
Caprioli	2013			y	y	NA
Foote	2011			y
Geiger	2012			y
Ilmonen	2008			y
Ouyang	2016			y
Pauliny	2006			y
Reichert	2014			y
Reichert	2015a			y
Sebastiano	2017			y
Ujvari	2016			y	y	NA
Ujvari	2009			y
Watson	2015			y
Hartmann	2009			y	n	Telomere length not related to individual survival (fish killed and pooled)
Näslund	2015			y	n	survival related to growth only
Adriaenssens	2016			n	n	no survival data
Bauch	2016			n	n	no survival data
Blevin	2016			n	n	no survival data
Brown	2012			n	n	some individuals were culled
Dantzer	2015			n	n	maximum lifespan data only
Gao	2015			n	n	Telomere length not measured in survival analysis
Gopalakrishnan	2013			n	n	Telomere length not related to individual survival (fish killed and pooled)
Hall	2004			n	n	no survival data
Hammers	2015			n	n	review
Haussmann	2003			n	n	average lifespan data only
Haussmann	2008			n	n	no survival data
Haussmann	2012			n	n	no survival data
Herborn	2014			n	n	no survival data
Hoelzl	2016			n	n	no survival data
Jennngs	1999			n	n	TL measured from multiple tissues
Le Vaillant	2015			n	n	no survival data
McLennan	2016			n	n	does not relate fry survival with emryo telomere length
Mizutani	2013			n	n	no survival data
Mizutani	2016			n	n	no survival data
Monaghan	2006			n	n	review
Nettle	2013			n	n	no survival data
Noguera	2016			n	n	no survival data
Plot	2012			n	n	no survival data
Reichert	2014			n	n	no survival data
Reichert	2015b			n	n	no survival data
Ringsby	2015			n	n	no survival data
Salmón	2016			n	n	no survival data
Schultner	2014			n	n	no survival data
Stier	2015			n	n	no survival data
Stier	2016			n	n	no survival data
Tissier	2014			n	n	no survival data
Turbill	2012			n	n	no survival data
Turbill	2013			n	n	no survival data
Vleck	2011			n	n	review
Vleck	2003			n	n	maximum lifespan data only
Wang	2013			n	n	no survival data
Watson	2016			n	n	no survival data
Young	2013			n	n	no survival data
Young	2015			n	n	no survival data

## Sheet: for meta-all papers
First_author	Year	Journal	Volume	Accepted	Included	Reason for rejection
Angelier	2013	Funct. Ecol.	23	y	y	NA
Asghar	2015	Science	347	y	y	NA
Barrett	2013	Mol. Ecol.	22	y	y	NA
Bauch	2014	Mol. Ecol.	23	y	y	NA
Beaulieu	2011	Funct. Ecol.	25	y	y	NA
Belmaker	2016	PhD Thesis	NA	y	y	NA
Bize	2009	Proc. R. Soc. B.	276	y	y	NA
Boonekamp	2014	Proc. R. Soc. B.	281	y	y	NA
Caprioli	2013	Biol. Lett.	9	y	y	NA
Fairlie	2016	Aging Cell	15	y	y	NA
Foote	2011	Behav. Ecol.	22	y	y	NA
Foote	2008	PhD Thesis	NA	y	y	NA
Froy	2014	PhD Thesis	NA	y	y	NA
Geiger	2012	Mol. Ecol.	21	y	y	NA
Haussmann	2005b	Biol. Lett.	1	y	Y	NA
Heidinger	2012	PNAS	109	y	y	NA
Olsson	2011	Mol. Ecol.	20	y	y	NA
Ouyang	2016	Int. Comp. Biol.	56	y	y	NA
Reichert	2014	Front. Ecol. Evol.	2	y	y	NA
Reichert	2015a	J. Exp. Biol.	218	y	y	NA
Salomons	2009	Proc. R. Soc. B.	276	y	y	NA
Stier	2014	Funct. Ecol	28	y	y	NA
Sudyka	2014	J. Evol. Biol.	27	y	y	NA
Taff	2017	Ecol. Evol.	7	y	y	NA
Ujvari	2016	PLoS One	4	y	y	NA
Ujvari	2009	Funct. Ecol.	31	y	y	NA
Watson	2015	J. Exp. Biol.	218	y	y	NA
Aydinonat	2014	PLoS One	9	y	n	≤ 5 individuals died
Hartmann	2009	Mech. Ageing. Dev.	130	y	n	Did not match selection criteria
Ilmonen	2008	PLoS One	3	y	n	Did not match selection criteria
Näslund	2015	Oecologia	177	y	n	Did not match selection criteria
Olsson	2011	PLoS One	6	y	n	Did not match selection criteria
Pauliny	2006	Mol. Ecol.	15	y	n	Data not available/ not provided
Pauliny	2012	BMC Evol. Biol.	12	y	n	Data not available/ not provided
Sebastiano	2017	Cons. Phys.	5	y	n	≤ 5 individuals died
Sudyka	2016	Behav. Ecol. Soc.	70	y	n	≤ 5 individuals died
Adriaenssens	2016	Physiol. Behav.	165	n	n	Missing survival data
Bauch	2016	Mol. Ecol.	25	n	n	Missing survival data
Blevin	2016	Sci. Total Environ.	563-564	n	n	Missing survival data
Brown	2012	J. Dairy Sci.	95	n	n	Did not match selection criteria
Dantzer	2015	Exp. Gerontol.	71	n	n	Did not match selection criteria
Gao	2015	PLoS One	10	n	n	Did not match selection criteria
Gopalakrishnan	2013	Front. Zool.	10	n	n	Did not match selection criteria
Hall	2004	Proc. R. Soc. B.	271	n	n	Missing survival data
Hammers	2015	Exp. Gerontol.	71	n	n	Not original data/ review
Haussmann	2003	Proc. Biol. Sci.	270	n	n	Did not match selection criteria
Haussmann	2008	Mol. Biol. Evol.	25	n	n	Missing survival data
Haussmann	2011	Proc. R. Soc. B.	doi:10.1098/rspb.2011.1913	n	n	Missing survival data
Herborn	2014	Proc. R. Soc. B.	281	n	n	Missing survival data
Hoelzl	2016	Sci. Rep.	6	n	n	Missing survival data
Jennings	1999	FEBS Lett.	448	n	n	Did not match selection criteria
Le Vaillant	2015	Polar Biol.	38	n	n	Missing survival data
McLennan	2016	Mol. Ecol.	25	n	n	Did not match selection criteria
Mizutani	2013	Biol. Lett.	9	n	n	Missing survival data
Mizutani	2016	PLoS One	11	n	n	Missing survival data
Monaghan	2006	Trends Ecol. Evol.	21	n	n	Not original data/ review
Nettle	2013	PLoS One	8	n	n	Missing survival data
Noguera	2016	Sci. Rep.	6	n	n	Missing survival data
Plot	2012	PLoS One	7	n	n	Missing survival data
Reichert	2014	Exp. Gerontol.	52	n	n	Missing survival data
Reichert	2015b	Heredity	114	n	n	Missing survival data
Ringsby	2015	Proc. R. Soc. B.	282	n	n	Missing survival data
Salmón	2016	Biol. Lett.	12	n	n	Missing survival data
Schultner	2014	Biol. Lett.	10	n	n	Missing survival data
Stier	2015	Exp. Gerontol.	71	n	n	Missing survival data
Stier	2016	J. Avian Biol.	47	n	n	Missing survival data
Tissier	2014	PLoS One	9	n	n	Missing survival data
Turbill	2012	Biol. Lett.	8	n	n	Missing survival data
Turbill	2013	Biol. Lett.	9	n	n	Missing survival data
Vleck	2011	J. Ornith.	152	n	n	Not original data/ review
Vleck	2003	Exp. Gerontol.	38	n	n	Did not match selection criteria
Wang	2013	Sheng Li Xue Bao.	65	n	n	Missing survival data
Watson	2016	IBIS	158	n	n	Missing survival data
Young	2013	PLoS One	8	n	n	Missing survival data
Young	2015	Ecosphere	6	n	n	Missing survival data
